# Supplementary material
Source: PubMed Central journal article supplement (PMC4253023)
Supplement: NIHMS619166-supplement-01.pdf [file NIHMS619166-supplement-01.pdf]

Table 1: Longitudinal retinal layer thickness analysis following intravitreal ocriplasmin

|                                      | Overall              | VMT Release          |                      | SRF Accumulation      |                      |
|--------------------------------------|----------------------|----------------------|----------------------|-----------------------|----------------------|
|                                      |                      | Yes                  | No                   | Yes                   | No                   |
| <b>Inner Retinal thickness (µm)</b>  |                      |                      |                      |                       |                      |
| Baseline                             | 25.4 ± 8.3           | 26.1 ± 8.3           | 24.8 ± 8.2           | 25.7 ± 7.8            | 25.0 ± 8.6           |
| 1 week                               | 26.5 ± 9.0           | 25.5 ± 8.3           | 27.5 ± 9.6           | 27.1 ± 8.7            | 25.8 ± 9.2           |
| 1 month                              | 24.5 ± 7.6           | 25.3 ± 8.2           | 23.6 ± 6.8           | 26.2 ± 7.7            | 22.6 ± 6.9           |
| 3 months                             | 25.1 ± 8.5           | 27.5 ± 8.5           | 20.7 ± 6.0           | 26.2 ± 8.6            | 23.0 ± 7.6           |
| <b>Middle retinal thickness (µm)</b> |                      |                      |                      |                       |                      |
| Baseline                             | 160.4 ± 23.5         | 163.4 ± 18.8         | 157.9 ± 26.6         | 161.6 ± 16.1          | 159.1 ± 28.8         |
| 1 week                               | 163.5 ± 19.8         | 160.5 ± 17.8         | 166.4 ± 21.2         | 163.7 ± 17.8          | 163.1 ± 21.5         |
| 1 month                              | 159.7 ± 22.2         | 160.5 ± 17.3         | 158.7 ± 26.8         | 161.6 ± 19.0          | 157.5 ± 24.9         |
| 3 months                             | 154.4 ± 21.6         | 162.1 ± 14.1         | 141.5 ± 25.3         | 160.5 ± 15.7          | 144.2 ± 24.9         |
| <b>Outer retinal thickness (µm)</b>  |                      |                      |                      |                       |                      |
| Baseline                             | 127.6 ± 18.5         | 126.7 ± 18.0         | 128.4 ± 18.9         | 127.3 ± 15.6          | 127.9 ± 20.7         |
| 1 week                               | <b>116.1 ± 21.1*</b> | <b>112.4 ± 16.9*</b> | 119.6 ± 23.9         | <b>106.2 ± 16.6*†</b> | <i>128.1 ± 19.1†</i> |
| 1 month                              | 123.0 ± 19.0         | <b>118.6 ± 14.0*</b> | 128.1 ± 22.4         | <b>116.3 ± 14.2*†</b> | <i>130.7 ± 20.5†</i> |
| 3 months                             | 127.3 ± 13.2         | 126.5 ± 13.8         | 128.7 ± 11.4         | 127.5 ± 12.4          | 127.0 ± 14.0         |
| <b>EZ-RPE Height (µm)</b>            |                      |                      |                      |                       |                      |
| Baseline                             | 30.2 ± 2.4           | 29.3 ± 2.0           | 31.0 ± 2.4           | 30.4 ± 2.4            | 30.0 ± 2.4           |
| 1 week                               | <b>18.3 ± 11.6*</b>  | <b>14.4 ± 9.2*†</b>  | <b>22.1 ± 12.5*†</b> | <b>8.3 ± 4.5*†</b>    | <i>30.3 ± 2.8†</i>   |
| 1 month                              | <b>21.9 ± 7.5*</b>   | <b>19.0 ± 6.8*†</b>  | <b>24.9 ± 6.9*†</b>  | <b>15.6 ± 4.5*†</b>   | <i>28.6 ± 2.5†</i>   |
| 3 months                             | <b>28.5 ± 2.9*</b>   | 28.1 ± 2.5           | <b>29.1 ± 3.4*</b>   | 28.0 ± 2.5*           | 29.2 ± 3.3           |

VMT: vitreomacular traction; SRF: subretinal fluid; µm: micrometer; EZ: outer segment ellipsoid zone; RPE: Retinal pigment epithelium

\*p < 0.05 compared to baseline (bold)

†p < 0.05 between comparison groups at same period (italics)
