# Supplementary material
Source: PubMed Central journal article supplement (PMC4253023)
Supplement: NIHMS619166-supplement-02.pdf [file NIHMS619166-supplement-02.pdf]

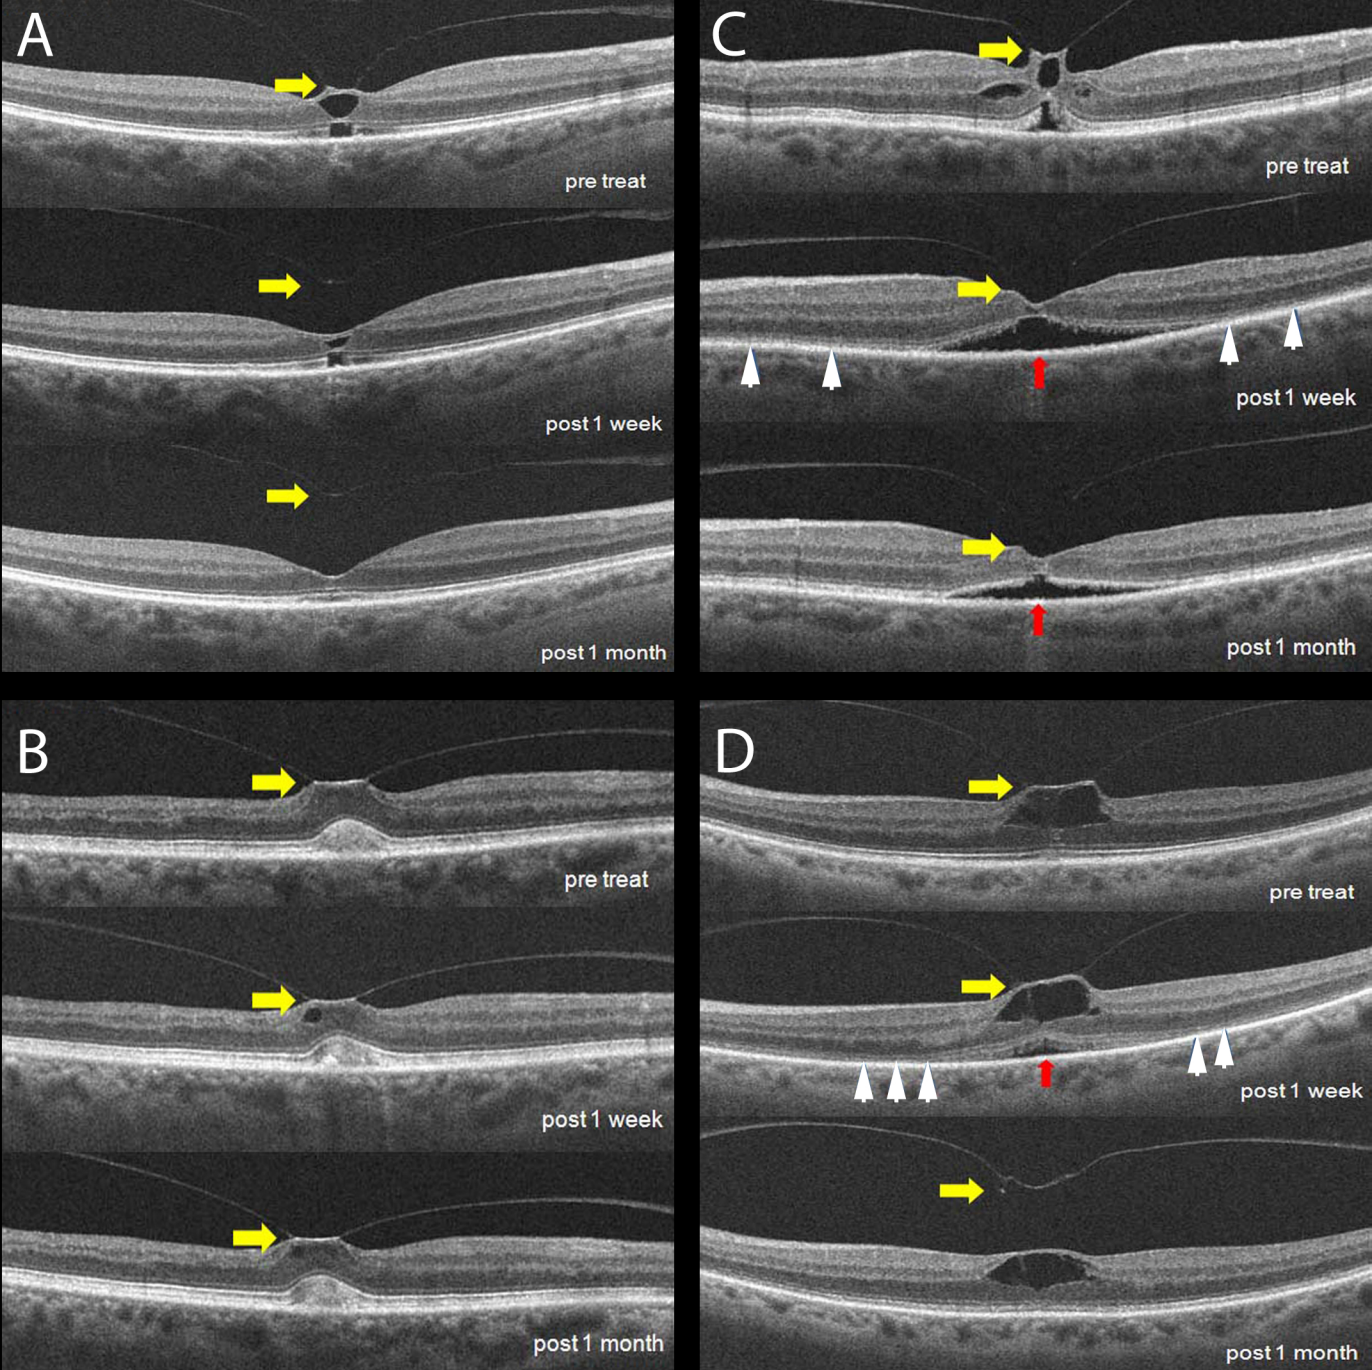

Figure 2: (A) Case example 1 reveals vitreomacular traction (VMT) release without appreciable changes to the ellipsoid zone (EZ) or increased subretinal fluid (SRF). Posterior hyaloid is noted with yellow arrow. (B) Case example 2 reveals persistent VMT (yellow arrow) and no appreciable architectural alterations, including in the EZ and subretinal space. (C) Case example 3 shows persistent VMT (yellow arrow) and significant loss of the EZ (white arrowhead) and large amount of SRF accumulation (red arrow). (D) Case example 4 exemplifies VMT release (yellow arrow highlights posterior hyaloid) with accompanying significant attenuation of the EZ (and reduction in EZ to retinal pigment epithelium distance, white arrowhead) and concurrent accumulation of SRF (red arrow).
